# Supplementary material for: Hepatic venous pressure gradient after balloon-occluded retrograde transvenous obliteration and liver stiffness measurement predict the prognosis of patients with gastric varices
Source: Springer Nature journal article supplement (doi:10.1186/s12876-022-02616-z), 2022-12-22
Supplement: MOESM1 [file 23852848]

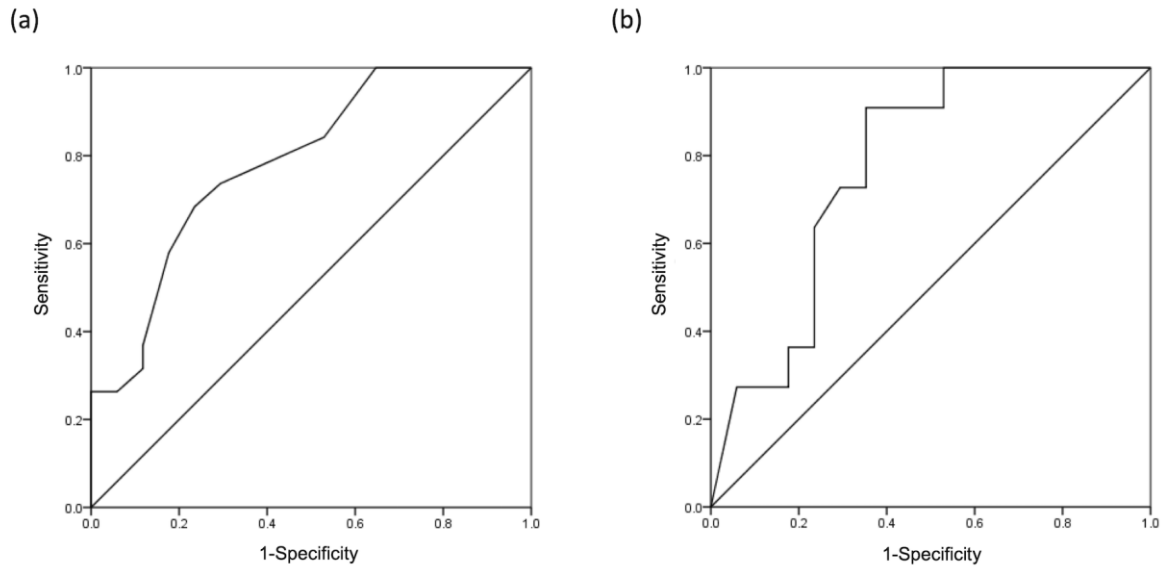

**Supplementary figure 1.**

(a) Receiver operating characteristic (ROC) curve of hepatic venous pressure gradient (HVPG) measured after performing balloon-occluded retrograde transvenous obliteration (BRTO) (post-HVPG) and exacerbation of esophageal varices (EVs) after BRTO. (b) ROC curve of liver stiffness measurement (LSM) and prognosis after BRTO.
